# Supplementary material for: In vitro histomorphometric comparison of dental pulp tissue in different teeth
Source: PeerJ. 2019 Dec 6;7:e8212. doi: 10.7717/peerj.8212 (PMC6901003; doi:10.7717/peerj.8212)
Supplement: Supplemental Information 1 [file peerj-07-8212-s001.xlsx]

## Sheet: Muestras 
Fecha de extracción dental	Tooth type	Folio	Medical records	Age	Gender	Date of obtaining the pulp	Tooth cutting technique	Weight of the dental pulp (g)	Length of the dental pulp (mm)	Width of the dental pulp (mm)	Integrity of the pulp obtained
2017-11-08	LOWER CENTRAL INCISOR DECIDUOS	5	10829-17	5	Female	2017-11-08	vertical	0.0036	5	1	Complete	5	9.61704	3.05656	0.0221795	-0.0117795
2018-01-16	LOWER CENTRAL INCISOR DECIDUOS	9	234-18	6	Male	2018-01-17	vertical	0.002	3	1	Complete	10	10.35	3.78956	0.0251795	-0.0087795
2018-01-17	PREMOLAR	10	6493-17	14	Female	2018-01-18	vertical	0.0122	10	2	Complete	15	11.083	4.52256	0.0281795	-0.0057795
2018-01-18	PREMOLAR	11	560-17	18	Male	2018-01-18	vertical	0.0088	10	2	Complete	20	11.816	5.25556	0.0311795	-0.0027795
2018-01-23	THIRD MOLAR	12	9620-17	17	Female	2018-01-24	vertical	0.0295	12	3	Complete	25	12.549	5.98856	0.0341795	0.000220499
2018-01-23	THIRD MOLAR	13	9620-17	17	Female	2018-01-24	vertical	0.0156	12	3	Complete
2018-01-24	THIRD MOLAR	14	624-18	23	Female	2018-01-24	vertical	0.0092	8	2	Complete
2018-01-24	THIRD MOLAR	15	624-18	23	Female	2018-01-24	vertical	0.014	5	2	Complete
2018-01-25	PREMOLAR	16	560-17	18	Male	2018-01-26	vertical	0.0127	8	2	Complete
2018-01-30	SUPERNUMERARY	17	11207-17	5	Male	2018-01-31	vertical	0.024	12	3	Complete
2018-01-30	SUPERNUMERARY	18	17-18	11	Male	2018-01-31	vertical	0.0054	7	2	Complete
2018-01-31	PREMOLAR	19	5617-16	13	Female	2018-01-31	vertical	0.0096	12	2	Complete
2018-01-31	PREMOLAR	20	5617-16	13	Female	2018-01-31	vertical	0.0064	8	2	Complete
2018-01-31	LOWER CENTRAL INCISOR DECIDUOS	21	1066-18	5	Female	2018-02-01	vertical	0.0004	3	1	Complete
2018-02-02	THIRD MOLAR	22	1293-18	21	Female	2018-02-02	vertical	0.0135	8	4	Complete
2018-02-03	LOWER CENTRAL INCISOR DECIDUOS	23	959-18	6	Female	2018-02-05	vertical	0.0022	5	1	Complete
2018-02-03	LOWER CENTRAL INCISOR DECIDUOS	24	959-18	6	Female	2018-02-05	vertical	0.0012	5	1	Complete
2018-02-03	LOWER CENTRAL INCISOR DECIDUOS	25	10829-17	6	Female	2018-02-05	vertical	0.0023	5	1	Complete
2018-02-06	LOWER CENTRAL INCISOR DECIDUOS	26	1347-18	5	Male	2018-02-07	vertical	0.0008	3	1	Complete
2018-02-06	SUPERNUMERARY	28	10568-17	5	Male	2018-02-07	vertical	0.0105	6	2	Complete
2018-02-06	SUPERNUMERARY	29	8561-16	12	Female	2018-02-07	vertical	0.003	5	1	Complete
2018-02-06	PREMOLAR	30	237-12	24	Female	2018-02-07	vertical	0.0031	4	1	Complete
2018-02-07	SUPERNUMERARY	32	1204-18	20	Male	2018-02-08	vertical	0.107	12	2	Complete
2018-02-07	SUPERNUMERARY	33	1204-18	20	Male	2018-02-08	vertical	0.0021	4	1	Complete
2018-02-07	SUPERNUMERARY	34	1204-18	20	Male	2018-02-08	vertical	0.0057	12	2	Complete
2018-02-07	SUPERNUMERARY	35	1204-18	20	Male	2018-02-08	vertical	0.0017	6	1	Complete
2018-02-15	LOWER CENTRAL INCISOR DECIDUOS	36	6253-15	5	Female	2018-02-16	vertical	0.0004	3	1	Complete
2018-02-20	SUPERNUMERARY	37	1600-18	10	Female	2018-02-21	vertical	0.0114	13	2	Complete
2018-02-23	THIRD MOLAR	38	1007-18	21	Female	2018-02-24	vertical	0.01	8	2	Complete
2018-02-26	PREMOLAR	39	237-12	15	Male	2018-02-27	vertical	0.0051	10	1	Complete
2018-02-26	PREMOLAR	40	237-12	15	Male	2018-02-27	vertical	0.0096	11	2	Complete
2018-02-28	PREMOLAR	41	10389-17	22	Female	2018-03-01	vertical	0.0061	6	1	Complete
2018-02-28	PREMOLAR	42	10389-17	22	Female	2018-03-01	vertical	0.0049	7	2	Complete
2018-03-05	LOWER CENTRAL INCISOR DECIDUOS	44	2427-18	5	Male	2018-03-06	vertical	0.0033	5	1	Complete
2018-03-05	LOWER CENTRAL INCISOR DECIDUOS	45	2427-18	5	Male	2018-03-06	vertical	0.0035	4	1	Complete
2018-03-09	SUPERNUMERARY	46	2318-18	8	Male	2018-03-10	vertical	0.0079	11	2	Complete
2018-03-12	THIRD MOLAR	47	2543-18	19	Male	2018-03-13	vertical	0.0309	14	3	Complete
2018-03-16	THIRD MOLAR	48	1067-10	22	Female	2018-03-17	vertical	0.0105	11	2	Complete
2018-03-16	THIRD MOLAR	50	1222-16	25	Male	2018-03-17	vertical	0.0172	10	4	Complete
2018-03-16	THIRD MOLAR	52	2478-12	25	Male	2018-03-17	vertical	0.008	5	4	Complete
							SD	0.0169795	3.28024	0.88176
							R2	0.0631	0.0999	0.2285
		MALE												FEMALE
		Age	Weigth (mg)	Length (mm)	Width (mm)	Weigth max		Lenght max		Width max				Age	Weight (mg)	Length (mm)	Width (mm)	Weight max		Length max		Width max
	5	6	2	3	1	-16.5428	29.8794	3.1433	9.9943	2.31384	0.42496		5	5	3.6	5	1	-2.93085	10.4621	9.20536	2.98784	2.02432	0.402477
	7	18	8.8	10	2	-23.2029	31.5206	3.4751	10.3261	2.44304	0.55416		7.5	14	12.2	10	2	-1.8166	11.5763	9.53911	3.32159	2.16682	0.544977
	9	18	12.7	8	2	-23.2013	33.1618	3.8069	10.6579	2.57224	0.68336		10	17	29.5	12	3	-0.702354	12.6906	9.87286	3.65534	2.30932	0.687477
	11	5	24	12	3	-23.1997	34.803	4.1387	10.9897	2.70144	0.81256		15	17	15.6	12	3	1.52615	14.9191	10.5404	4.32284	2.59432	0.972477
	13	11	5.4	7	2	-23.1981	36.4442	4.4705	11.3215	2.83064	0.94176		20	23	9.2	8	2	3.75465	17.1476	11.2079	4.99034	2.87932	1.25748
	15	5	0.8	3	1	-23.1965	38.0854	4.8023	11.6533	2.95984	1.07096		25	23	14	5	2	5.98315	19.3761	11.8754	5.65784	3.16432	1.54248
	17	5	10.5	6	2	-23.1949	39.7266	5.1341	11.9851	3.08904	1.20016			13	9.6	12	2
	19	20	107	12	2	-23.1933	41.3678	5.4659	12.3169	3.21824	1.32936			13	6.4	8	2
	21	20	2.1	4	1	-23.1917	43.009	5.7977	12.6487	3.34744	1.45856			5	0.4	3	1
	23	20	5.7	12	2	-23.1901	44.6502	6.1295	12.9805	3.47664	1.58776			21	13.5	8	4
	25	20	1.7	6	1	-23.1885	46.2914	6.4613	13.3123	3.60584	1.71696			6	2.2	5	1
		15	5.1	10	1									6	1.2	5	1
		15	9.6	11	2									6	2.3	5	1
		5	3.3	5	1									12	3	5	1
		5	3.5	4	1									24	3.1	4	1
		8	7.9	11	2									5	0.4	3	1
		19	30.9	14	3									10	11.4	13	2
		25	17.2	10	4									21	10	8	2
		25	8	5	4									22	6.1	6	1
		R2	0.0631	0.1183	0.2361									22	4.9	7	2
		SD	23.2111	3.4255	0.94444									22	10.5	11	2
														R2	0.2149	0.0895	0.2399
peso														SD	6.69645	3.10876	0.810923			Resumen
																				Estadísticas de la regresión
																				Coeficiente de correlación múltiple	0.251163
																				Coeficiente de determinación R^2	0.0630829
																				R^2 ajustado	0.00797008
																				Error típico	7.26982
																				Observaciones	19
																				ANÁLISIS DE VARIANZA
																					Grados de libertad	Suma de cuadrados	Promedio de los cuadrados	F	Valor crítico de F
																				Regresión	1	60.4931	60.4931	1.14461	0.299635
																				Residuos	17	898.454	52.8502
																				Total	18	958.947
																					Coeficientes	Error típico	Estadístico t	Probabilidad	Inferior 95%	Superior 95%	Inferior 95.0%	Superior 95.0%
																				Intercepción	12.8703	1.94809	6.60663	4.4477e-06	8.7602	16.9804	8.7602	16.9804
																				Variable X 1	76.8742	71.854	1.06987	0.299635	-74.7246	228.473	-74.7246	228.473
																				Resultados de datos de probabilidad
																				Percentil	Y
																				2.63158	5
																					5
																					5
																					5
																					5
																					6
																					8
																					11
																					15
																					15
																					18
																					18
																					19
																					20
																					20
																					20
																					20
																					25
																					25
	One-factor analysis of variance
									One-factor analysis of variance
	SUMMARY								SUMMARY
	Groups	Cuenta	Sum	Average	Variance				Groups	Cuenta	Sum	Average	Variance
	Age (years)	19	265	13.9474	53.2749				Age (years)	19	265	13.9474	53.2749
	Weigth (mg)	19	0.2662	0.0140105	0.000568685				Weigth (mg)	19	0.2662	0.0140105	0.000568685
	Length (mm)	19	153	8.05263	12.386				Length (mm)	19	153	8.05263	12.386
	Width (mm)	19	37	1.94737	0.94152				Width (mm)	19	37	1.94737	0.94152
	ANALYSIS OF VARIANCE								ANALYSIS OF VARIANCE
	Origin of the variations	Sum of squares	Degrees of freedom	Average of the squares	F value	Probability	Critical value for F		Origin of the variations	Sum of squares	Degrees of freedom	Average of the squares	F value	Probability	Critical value for F
	Between groups	2272.96	3	757.653	45.5027	1.32346e-16	2.73181		Between groups	2272.96	3	757.653	45.5027	1.32346e-16	2.73181
	Within groups	1198.85	72	16.6507					Within groups	1198.85	72	16.6507
	Total	3471.81	75						Total	3471.81	75
		Parameters	Male				Female
			Average	SD	Variance	R2	Average	SD	Variance	R2
		Weight (g)	14.0105	23.2111	0.000568685	0.0631	8.05238	6.69645	0.000568685	0.2149
		Lenght (mm)	8.05263	3.4255	12.386	0.1183	7.38095	3.10876	12.386	0.0895
		Windth (mm)	1.94737	0.94444	0.94152	0.2361	1.7619	0.810923	0.94152	0.2399
