# Supplementary material for: In vitro histomorphometric comparison of dental pulp tissue in different teeth
Source: PeerJ. 2019 Dec 6;7:e8212. doi: 10.7717/peerj.8212 (PMC6901003; doi:10.7717/peerj.8212)
Supplement: Supplemental Information 3 [file peerj-07-8212-s003.xlsx]

## Sheet: Todos
Key code	Folio	Cellular density (céll/mm2)
Premolares
		Coronal	Cervical	Middle	Apical
18-4040	10	58	30	19	52
18-4041	11	45	46	29	54
18-4042	16	41	32	16	54
18-4043	19	34	46	19	31
18-4044	20	41	21	19	45
1818-4484	30	42	42	28	65
1818-4486	39	38	40	38	55
1818-4487	40	33	44	32	48
1818-4488	41	33	42	37	66
1818-4489	42	44	25	21	46
Third molars
1818-4479	12	22	17	15	30
1818-4480	13	23	16	6	32
1818-4481	14	18	21	13	27
1818-4482	15	17	21	22	30
1818-4483	22	23	27	16	34
1818-4485	38	18	17	8	30
1818-4490	47	11	11	9	30
1818-4491	48	25	19	5	32
1818-4492	50	21	23	15	28
1818-4493	52	14	22	13	30
Supernumerary
18-4754	17	45	56	26	63
18-4755	18	31	41	28	57
18-4756	28	57	32	23	59
18-4757	29	47	51	36	82
18-4758	32	50	27	22	59
18-4759	33	46	38	27	65
18-4760	34	26	30	25	49
18-4761	35	46	46	28	53
18-4762	37	33	38	19	72
18-4763	46	16	26	15	51
Deciduos
18-5030	5	29	18	Undetermined	Undetermined
18-5031	9	42	36	Undetermined	Undetermined
18-5032	21	42	33	Undetermined	Undetermined
18-5033	23	61	51	Undetermined	Undetermined
18-5034	24	44	62	Undetermined	Undetermined
18-5035	25	72	67	Undetermined	Undetermined
18-5036	26	35	57	Undetermined	Undetermined
18-5037	36	38	45	Undetermined	Undetermined
18-5038	44	41	45	Undetermined	Undetermined
18-5039	45	69	54	Undetermined	Undetermined

## Sheet: Premolares
Key code	Folio		Cellular density (cells/mm2)
Premolares								Premolares	Average	SD	Variance	R2	One-factor analysis of variance
		Age (years)	Coronal	Cervical	Middle	Apical		Coronal	40.9	7.5	55.6556	0.0047
18-4040	10	14	58	30	19	52		Cervical	36.8	9.1	82.6222	0.0055	Summary
18-4041	11	17	45	46	29	54		Medio	25.8	8.1	65.0667	0.0659	Groups	Cuenta	Sum	Average	Variance
18-4042	16	18	41	32	16	54		Apical	51.6	10.1	102.489	0.451	Age (years)	10	173	17.3	16.4556
18-4043	19	13	34	46	19	31							Coronal	10	409	40.9	55.6556
18-4044	20	13	41	21	19	45							Cervical	10	368	36.8	82.6222
1818-4484	30	24	42	42	28	65							Middle	10	258	25.8	65.0667
1818-4486	39	15	38	40	38	55							Apical	10	516	51.6	102.489
1818-4487	40	15	33	44	32	48
1818-4488	41	22	33	42	37	66
1818-4489	42	22	44	25	21	46							ANALYSIS OF VARIANCE
		Media	40.9	36.8	25.8	51.6							Origin of the variations	Sum of squares	Degrees of freedom	Average square	F value	Probability	Critical value for F
		SD	7.46027	9.08968	8.06639	10.1237							Between groups	7101.88	4	1775.47	27.5447	1.35947e-11	2.57874
													Within the groups	2900.6	45	64.4578
		Age (years)	Coronal	Cervical	Middle	Apical							Total	10002.5	49
		13	34	46	19	31
		13	41	21	19	45
		14	58	30	19	52
		15	38	40	38	55
		15	33	44	32	48
		17	45	46	29	54
		18	41	32	16	54
		22	33	42	37	66
		22	44	25	21	46
		24	42	42	28	65
			Variance analysis of a factor
			Summary
			Groups	Cuenta	Sum	Average	Variance			It is significant given that F is much greater than the critical value 4.41
			Edad [años]	10	173	17.3	16.4556
			Coronal	10	409	40.9	55.6556
			VARIANCE ANALYSIS
			Origin of the variations	Suma de cuadrados	Grados de libertad	Average square	F	Probability	Critical value for F
			Between groups	2784.8	1	2784.8	77.2364	6.26697e-08	4.41387
			Within the groups	649	18	36.0556
			Total	3433.8	19
			Variance analysis of a factor
			Summary
			Groups	Cuenta	Sum	Average	Variance
			Age (years)	10	173	17.3	16.4556
			Coronal	10	409	40.9	55.6556
			Cervical	10	368	36.8	82.6222
			Middle	10	258	25.8	65.0667
			Apical	10	516	51.6	102.489
			VARIANCE ANALYSIS
			Origin of the variations	Suma de cuadrados	Degree	Average square	F	Probability	Critical value for F
			Between groups	7101.88	4	1775.47	27.5447	1.35947e-11	2.57874
			Within the groups	2900.6	45	64.4578
			Total	10002.5	49

## Sheet: Third molar
Key code	Folio		Cell density (cell/mm2)
Premolares								Third molar	Average	SD	Variance	R2		One-factor analysis of variance
		Age (years)	Coronal	Cervical	Middle	Apical		Coronal	19.2	4.4	19.5111	0.0453
1818-4479	12	17	22	17	15	30		Cervical	19.4	4.4	19.6	0.3734		Summary
1818-4480	13	17	23	16	6	32		Medio	12.2	5.2	27.2889	0.1253		Groups	Cuenta	Sum	Average	Variance
1818-4481	14	23	18	21	13	27		Apical	30.3	2	4.01111	0.159		Age (years)	10	213	21.3	8.45556
1818-4482	15	23	17	21	22	30								Coronal	10	192	19.2	19.5111
1818-4483	22	21	23	27	16	34								Cervical	10	194	19.4	19.6
1818-4485	38	21	18	17	8	30								Middle	10	122	12.2	27.2889
1818-4490	47	19	11	11	9	30								Apical	10	303	30.3	4.01111
1818-4491	48	22	25	19	5	32
1818-4492	50	25	21	23	15	28
1818-4493	52	25	14	22	13	30							ANALYSIS OF VARIANCE
		Average	19.2	19.4	12.2	30.3							Origin of the variations	Sum of squares	Degrees of freedom	Average square	F value	Probability	Critical value for F
		SD	4.41714	4.42719	5.22388	2.00278							Between groups	1684.68	4	421.17	26.7014	2.21003e-11	2.57874
													Within the groups	709.8	45	15.7733
													Total	2394.48	49

## Sheet: Supernum
Key code	Folio		Cell density (cells/mm2)
Supernumeray								Supernumerarios	Average	SD	Variance	R2		One-factor analysis of variance
		Age (years)	Coronal	Cervical	Middle	Apical		Coronal	39.7	12.6	159.567	0.002
18-4754	17	5	45	56	26	63		Cervical	38.5	10.2	103.167	0.0521		Summary
18-4755	18	11	31	41	28	57		Medio	24.9	5.7	32.5444	0.0503		Groups	Cuenta	Sum	Average	Variance
18-4756	28	5	57	32	23	59		Apical	61	10.1	101.556	0.0449		Age (years)	10	131	13.1	40.3222
18-4757	29	12	47	51	36	82								Coronal	10	397	39.7	159.567
18-4758	32	20	50	27	22	59								Cervical	10	385	38.5	103.167
18-4759	33	20	46	38	27	65								Middle	10	249	24.9	32.5444
18-4760	34	20	26	30	25	49								Apical	10	610	61	101.556
18-4761	35	20	46	46	28	53
18-4762	37	10	33	38	19	72
18-4763	46	8	16	26	15	51								ANALYSIS OF VARIANCE
		Average	39.7	38.5	24.9	61								Origin of the variations	Sum of squares	Degrees of freedom	Average square	F value	Probability	Critical value for F
		SD	12.632	10.1571	5.70477	10.0775								Between groups	12909.9	4	3227.48	36.9145	1.12382e-13	2.57874
														Within the groups	3934.4	45	87.4311
														Total	16844.3	49
								30

## Sheet: Deciduos
Key code	Folio		Cell density (cell/mm2)
Deciduos								Deciduos	Average	SD	Variance	R2		One-factor analysis of variance
		Age (years)	Coronal	Cervical	Middle	Apical		Coronal	47.3	14.7	216.456	0.1899
18-5030	5	5	29	18	undetermined	undetermined		Cervical	46.8	14.7	217.289	0.1767		Summary
18-5031	9	6	42	36	undetermined	undetermined		Middle	undetermined	undetermined				Groups	Cuenta	Sum	Average	Variance
18-5032	21	5	42	33	undetermined	undetermined		Apical	undetermined	undetermined				Age (years)	10	54	5.4	0.266667
18-5033	23	6	61	51	undetermined	undetermined								Coronal	10	473	47.3	216.456
18-5034	24	6	44	62	undetermined	undetermined								Cervical	10	468	46.8	217.289
18-5035	25	6	72	67	undetermined	undetermined
18-5036	26	5	35	57	undetermined	undetermined
18-5037	36	5	38	45	undetermined	undetermined							ANALISIS OF VARIANCE
18-5038	44	5	41	45	undetermined	undetermined							Origin of the variations	Sum of squares	Degrees of freedom	Average square	F value	Probability	Critical value for F
18-5039	45	5	69	54	undetermined	undetermined							Between groups	11566.1	2	5783.03	39.9739	8.50345e-09	3.35413
		Average	47.3	46.8	undetermined	undetermined							Within the groups	3906.1	27	144.67
		SD	14.7124	14.7407	undetermined	undetermined
													Total	15472.2	29

## Sheet: Hoja1
	Premolares	Average	SD	Variance	R2
	Coronal	40.9	7.5	55.6556	0.0047
	Cervical	36.8	9.1	82.6222	0.0055
	Middle	25.8	8.1	65.0667	0.0659
	Apical	51.6	10.1	102.489	0.451
	Third molar	Media	SD	Variance	R2
	Coronal	19.2	4.4	19.5111	0.0453
	Cervical	19.4	4.4	19.6	0.3734
	Middle	12.2	5.2	27.2889	0.1253
	Apical	30.3	2	4.01111	0.159
	Supernumerary	Media	SD	Variance	R2
	Coronal	39.7	12.6	159.567	0.002
	Cervical	38.5	10.2	103.167	0.0521
	Middle	24.9	5.7	32.5444	0.0503
	Apical	61	10.1	101.556	0.0449
	Deciduos	Media	SD	Variance	R2
	Coronal	47.3	14.7	216.456	0.1899
	Cervical	46.8	14.7	217.289	0.1767
	Middle	undetermined	undetermined
	Apical	undetermined	undetermined
							Coronal				Cervical				Middle				Apical
							average	SD	Variance	R2	average	sd	Variance	R2	average	sd	Variance	R2	average	sd	Variance	R2	F value	Critic Value F
						Premolar	40.9	7.5	55.6556	0.0047	36.8	9.1	82.6222	0.0055	25.8	8.1	65.0667	0.0659	51.6	10.1	102.489	0.451	27.5447	2.57874
						Third molar	19.2	4.4	19.5111	0.0453	19.4	4.4	19.6	0.3734	12.2	5.2	27.2889	0.1253	30.3	2	4.01111	0.159	26.7014	2.57874
						Supernumerary	39.7	12.6	159.567	0.002	38.5	10.2	103.167	0.0521	24.9	5.7	32.5444	0.0503	61	10.1	101.556	0.0449	36.9145	2.57874
						Deciduos	47.3	14.7	216.456	0.1899	46.8	14.7	217.289	0.1767	NA				NA				39.9739	3.35413
				deciduos coronal
																									Premolar apical
																									Tercer molar cervical
																									tercer molar medio
